# Supplementary material for: Influence of the new standardized clinical cryopreservation/slow thawing protocol on immunogenicity of arterial allografts in rats
Source: PLoS One. 2020 Mar 10;15(3):e0230234. doi: 10.1371/journal.pone.0230234 (PMC7064217; doi:10.1371/journal.pone.0230234)
Supplement: S1 Table — (XLSX) [file pone.0230234.s001.xlsx]

## Sheet: Grafts_times
	Group	Donor	Graft	Recipient	PRE-FREEZING CIT (hours)	DMSO Time (hours)	CRYO time (hours)	NITROGEN time (days)	THAWING time (hours)	POST-THAWING CIT (hours)	Total CIT (hours)
	CRYO-ISO	31	31A	70	03:28:00	00:42:00	02:38:00	171	01:45:00	00:58:00	04:26:00
	CRYO-ISO	31	31B	71	03:28:00	00:42:00	02:38:00	171	01:45:00	01:53:00	05:51:00
	CRYO-ISO	32	32A	72	03:16:00	00:42:00	02:38:00	171	01:45:00	02:50:00	06:06:00
	CRYO-ISO	32	32B	73	03:16:00	00:42:00	02:38:00	171	01:45:00	03:27:00	06:43:00
	CRYO-ISO	33	33A	84	02:54:00	00:38:00	02:38:00	176	01:10:00	01:08:00	04:02:00
	CRYO-ISO	33	33B	85	02:24:00	00:38:00	02:38:00	176	01:10:00	01:47:00	04:41:00
	CRYO-ALLO	15	15A	66	04:45:00	00:48:00	02:38:00	181	01:33:00	04:26:00	09:11:00
	CRYO-ALLO	15	15B	68	04:45:00	00:48:00	02:38:00	181	01:33:00	05:35:00	10:20:00
	CRYO-ALLO	16	16A	67	04:26:00	00:48:00	02:38:00	181	01:33:00	06:25:00	10:51:00
	CRYO-ALLO	16	16B	69	04:26:00	00:48:00	02:38:00	181	01:33:00	07:07:00	11:33:00
	CRYO-ALLO	39	39A	86	01:23:00	00:19:00	02:38:00	176	01:10:00	02:26:00	03:49:00
	CRYO-ALLO	39	39B	87	01:23:00	00:19:00	02:38:00	176	01:10:00	03:21:00	04:44:00
